# Supplementary material for: Factors Related to Non-participation in the Basque Country Colorectal Cancer Screening Programme
Source: PubMed Central journal article supplement (PMC7760939; doi:10.3389/fpubh.2020.604385), 2020-12-11
Supplement: Data_Sheet_2.pdf [file Data_Sheet_2.pdf]

**Additional File 2.** Summary of variables

| VARIABLES                | CATEGORIES                                                                                                                                                                                                                                                                     |
|--------------------------|--------------------------------------------------------------------------------------------------------------------------------------------------------------------------------------------------------------------------------------------------------------------------------|
| Age                      | 50-60<br>61-71                                                                                                                                                                                                                                                                 |
| Sex                      | Man<br>Woman                                                                                                                                                                                                                                                                   |
| Smoking                  | Smoker: if affirmative information was registered<br>in the medical records during the last four years<br>Non-smoker                                                                                                                                                           |
| Diabetes<br>mellitus     | Diabetic: Code 250 (CIE-10) before invitation<br>Non-diabetic<br><i>Among diabetics, it was considered controlled if<br/>they had HbA1c<math>\leq</math>7.6% in the last measure over eight<br/>months before invitation.</i>                                                  |
| Arterial<br>hypertension | Hypertensive: Code 401-404 (CIE-10) before<br>invitation<br>Non-hypertensive.<br><i>Among hypertensives, it was considered controlled<br/>if they had SBP<math>\leq</math>140mmHg or DBP<math>\leq</math>90mmHg in the last<br/>three measurements over the last two years</i> |
| Obesity                  | Obese: BMI $\geq$ 30 in the last two years<br>Non-obese.<br><i>Among the obese, it was considered controlled if<br/>they had two or more BMI measurements over the last two<br/>years</i>                                                                                      |

|                                                                                    |                                                                                                                                                                                                                                                           |
|------------------------------------------------------------------------------------|-----------------------------------------------------------------------------------------------------------------------------------------------------------------------------------------------------------------------------------------------------------|
| Use of the health services (visits to the GP and/or nurse)                         | $\leq 6$<br>7-15<br>16-28<br>$\geq 29$                                                                                                                                                                                                                    |
| Influenza vaccines (only for people $\geq 65$ years old during the last two years) | Vaccinated<br>Non-vaccinated                                                                                                                                                                                                                              |
| Comorbidity index <sup>16</sup>                                                    | Very low<br>Low<br>Moderate<br>Severe                                                                                                                                                                                                                     |
| Deprivation index <sup>15</sup>                                                    | Very low<br>Low<br>Moderate<br>High<br>Very high                                                                                                                                                                                                          |
| Type of participant                                                                | Regular participant: participation in the last invitation and in the previous one or more<br>Non-participant: never participated<br>Irregular participant: participation in the last invitation, although not in the previous one or the other way round. |

Initial participant (PIN): participation in first invitation in the studied period

Successive participant (PIS): initial participation in second or subsequent invitations
