# Supplementary material for: Factors Related to Non-participation in the Basque Country Colorectal Cancer Screening Programme
Source: PubMed Central journal article supplement (PMC7760939; doi:10.3389/fpubh.2020.604385), 2020-12-11

### Additional File 3

Description of the participation and results of the BCSP of the Basque Country between 2015 and 2017 using a flowchart

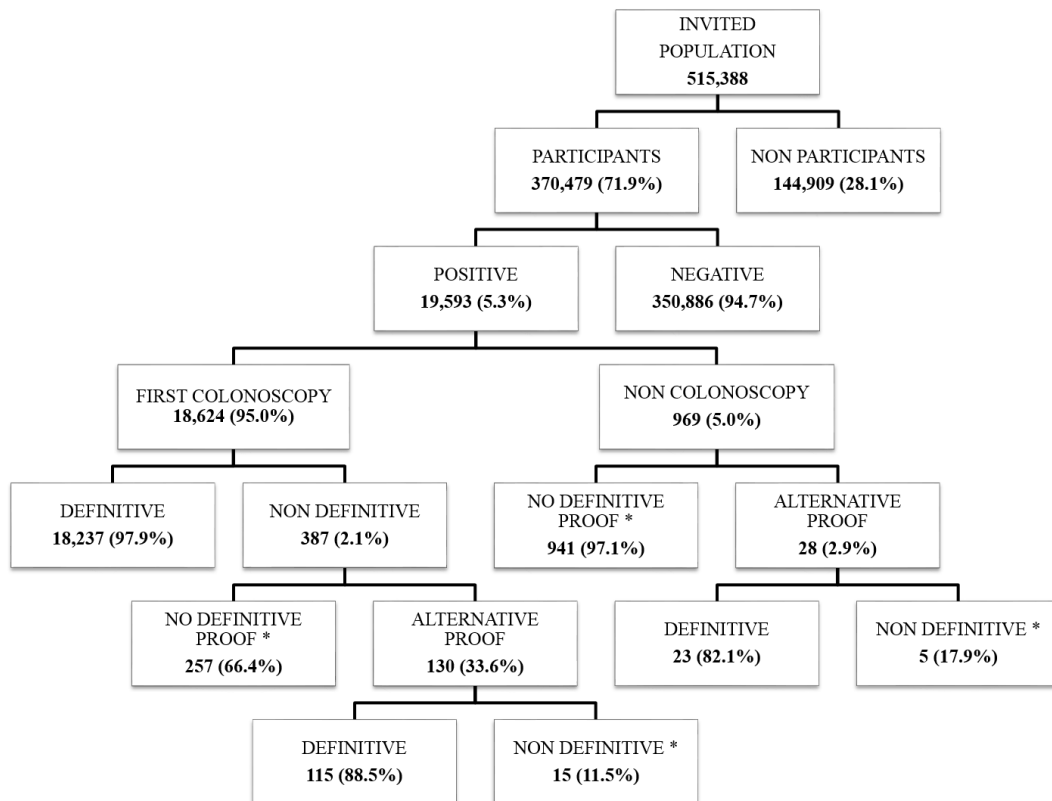

Supplement: Data_Sheet_3.pdf [file Data_Sheet_3.pdf]
