# Supplementary material for: Factors Related to Non-participation in the Basque Country Colorectal Cancer Screening Programme
Source: PubMed Central journal article supplement (PMC7760939; doi:10.3389/fpubh.2020.604385), 2020-12-11
Supplement: Data_Sheet_4.pdf [file Data_Sheet_4.pdf]

#### **Additional File 4.**

#### **Multivariate analysis by sex of the factors related to non-participation**

##### **1. Women**

| <b>Variables</b>                                       | <b>OR</b> | <b>95% C.I</b> |
|--------------------------------------------------------|-----------|----------------|
| <b>Age (ref. 61-71 years)</b>                          |           |                |
| 50-60 years                                            | 1.13      | 1.11-1.16      |
| <b>Comorbidity index (ref. Very low)</b>               |           |                |
| Low                                                    | 0.88      | 0.86-0.90      |
| Moderate                                               | 1.20      | 1.15-1.25      |
| Severe                                                 | 2.21      | 2.06-2.36      |
| <b>Deprivation index (ref. Very low)</b>               |           |                |
| Very high                                              | 1.11      | 1.08-1.15      |
| High                                                   | 0.90      | 0.87-0.93      |
| Moderate                                               | 0.84      | 0.81-0.86      |
| Low                                                    | 0.85      | 0.83-0.88      |
| <b>Tobacco (ref. Non-smoker)</b>                       |           |                |
| Smoker                                                 | 1.20      | 1.18-1.23      |
| <b>Diabetes (ref. Non-diabetic)</b>                    |           |                |
| Diabetic                                               | 1.57      | 1.51-1.63      |
| <b>Arterial hypertension (ref. Non-hypertensive)</b>   |           |                |
| Hypertensive                                           | 1.24      | 1.21-1.27      |
| <b>Primary care visits (ref. <math>\geq 29</math>)</b> |           |                |
| $\leq 6$                                               | 2.50      | 2.41-2.58      |
| 7-15                                                   | 1.44      | 1.40-1.49      |
| 16-28                                                  | 1.14      | 1.10-1.17      |

Note: All the variables showed a statistically significant association ( $p < 0.001$ )

## 2. Men

| Variables                                              | OR   | 95% C.I   |
|--------------------------------------------------------|------|-----------|
| <b>Age (ref. 61-71 years)</b>                          |      |           |
| 50-60 years                                            | 1.24 | 1.22-1.27 |
| <b>Comorbidity index (ref. Very low)</b>               |      |           |
| Low                                                    | 0.88 | 0.86-0.90 |
| Moderate                                               | 1.23 | 1.18-1.27 |
| Severe                                                 | 2.02 | 1.91-2.15 |
| <b>Deprivation index (ref. Very low)</b>               |      |           |
| Very high                                              | 1.17 | 1.13-1.20 |
| High                                                   | 0.93 | 0.90-0.96 |
| Moderate                                               | 0.87 | 0.85-0.90 |
| Low                                                    | 0.86 | 0.84-0.89 |
| <b>Tobacco (ref. Non-smoker)</b>                       |      |           |
| Smoker                                                 | 1.21 | 1.19-1.23 |
| <b>Obesity (ref. Non-obese)</b>                        |      |           |
| Obese                                                  | 0.96 | 0.93-0.99 |
| <b>Diabetes (ref. Non-diabetic)</b>                    |      |           |
| Diabetic                                               | 1.32 | 1.27-1.36 |
| <b>Arterial hypertension (ref. Non-hypertensive)</b>   |      |           |
| Hypertensive                                           | 1.06 | 1.03-1.08 |
| <b>Primary care visits (ref. <math>\geq 29</math>)</b> |      |           |
| $\leq 6$                                               | 2.27 | 2.19-2.35 |
| 7-15                                                   | 1.43 | 1.39-1.48 |
| 16-28                                                  | 1.17 | 1.13-1.20 |

Note: All the variables showed a statistically significant association (all variables  $p < 0.001$ , except "Obesity"  $p = 0.015$ )
